# Supplementary material for: Kinetic Characterization and Catalytic Mechanism of N-Acetylornithine Aminotransferase Encoded by slr1022 Gene from Synechocystis sp. PCC6803
Source: MDPI journal article supplement (doi:10.3390/ijms24065853), 2023-03-19
Supplement: s1 [file s1]

# **Kinetic Characterization and Catalytic Mechanism of *N*-Acetylornithine Aminotransferase**

**Encoded by *slr1022* Gene from *Synechocystis* sp. PCC6803**

**Table S1.** Primer sequences of Slr1022 mutants

| Mutants | Primers | Sequences of Primers                             |
|---------|---------|--------------------------------------------------|
| A127S   | A127S-F | CTTTTGCAACTCTGGG <b><u>T</u></b> CAGAGGCCAAT     |
|         | A127S-R | <b><u>A</u></b> CCCAGAGTTGCAAAAGAAAACCCGGTC      |
| D251A   | D251A-F | ATATTTTGTGTTGGTCTTT <b><u>G</u></b> CCGAAGTGCAAG |
|         | D251A-R | <b><u>G</u></b> CAAAGACCAACAAAATATCGTTTTGGTCAC   |
| G126A   | G126A-F | TTTTCTTTTGCAACTCTG <b><u>C</u></b> GGCAGAGGCCAAT |
|         | G126A-R | <b><u>G</u></b> CAGAGTTGCAAAAGAAAACCCGGTCCGCACA  |
| K280A   | K280A-F | ACATTTTCACCAGTGCC <b><u>G</u></b> CGGGTCTGGCCG   |
|         | K280A-R | <b><u>G</u></b> CGGCACTGGTGAAAATGTCTGGCTCCACC    |
| Q254A   | Q254A-F | GGTCTTTGACGAAGTG <b><u>GCG</u></b> GTGGGGGTAG    |
|         | Q254A-R | <b><u>CGC</u></b> CACTTCGTCAAAGACCAACAAAATATCGT  |
| S125A   | S125A-F | GTTTTCTTTTGCAAC <b><u>G</u></b> CTGGGGCAGA       |
|         | S125A-R | <b><u>C</u></b> GTTGCAAAAGAAAACCCGGTCCGCA        |
| T308A   | T308A-F | GGCAACCATGCCAGT <b><u>G</u></b> CCTTTGGTGGTAAT   |
|         | T308A-R | <b><u>C</u></b> ACTGGCATGGTTGCCCGGCTCAAATA       |
| E223A   | E223A-F | AACCTCTCCAAGGGG <b><u>C</u></b> GGGGGGAGTC       |
|         | E223A-R | <b><u>G</u></b> CCCCTTGGAGAGGTTCGAGGAAAATGGCTG   |
| E223S   | E223S-F | GAACCTCTCCAAGGG <b><u>AGC</u></b> GGGGGGAGTCC    |
|         | E223S-R | <b><u>GCT</u></b> CCCTTGGAGAGGTTCGAGGAAAATGGCTG  |
| D251E   | D251E-F | TTTTGTTGGTCTTTGA <b><u>A</u></b> GAAGTGCAAG      |
|         | D251E-R | <b><u>T</u></b> TCAAAGACCAACAAAATATCGTTTTGGTC    |
| Y39F    | Y39F-F  | CCTATGTGATGAACACCT <b><u>T</u></b> TGGGCGATTTC   |
|         | Y39F-R  | <b><u>AA</u></b> AGGTGTTTCATCATAGGTATCAAAATCTG   |
| R163A   | R163A-F | TAGTTTCCACGGC <b><u>GCG</u></b> ACCCTAGCCAC      |
|         | R163A-R | <b><u>CGC</u></b> GCCGTGGAAACTAGCTTTGGCG         |
| R402A   | R402A-F | TGGTCCCAAAGTGTTA <b><u>GCG</u></b> TTTGTGCCCC    |
|         | R402A-R | <b><u>CGC</u></b> TAACACTTTGGGACCAGCGGGGG        |

Note: The mutated nucleotides are in bold and underlined.

**Table S2.** Ramachandran plot statistics of Slr022 model structure computed with PROCHECK program

| Residue regions                        | Proportion (%) |
|----------------------------------------|----------------|
| residues in most favored regions       | 86.2           |
| residues in additional allowed regions | 12.9           |
| residues in generously allowed regions | 0.3            |
| residues in disallowed regions         | 0.6            |
| non-glycine and non-proline residues   | 100.0          |

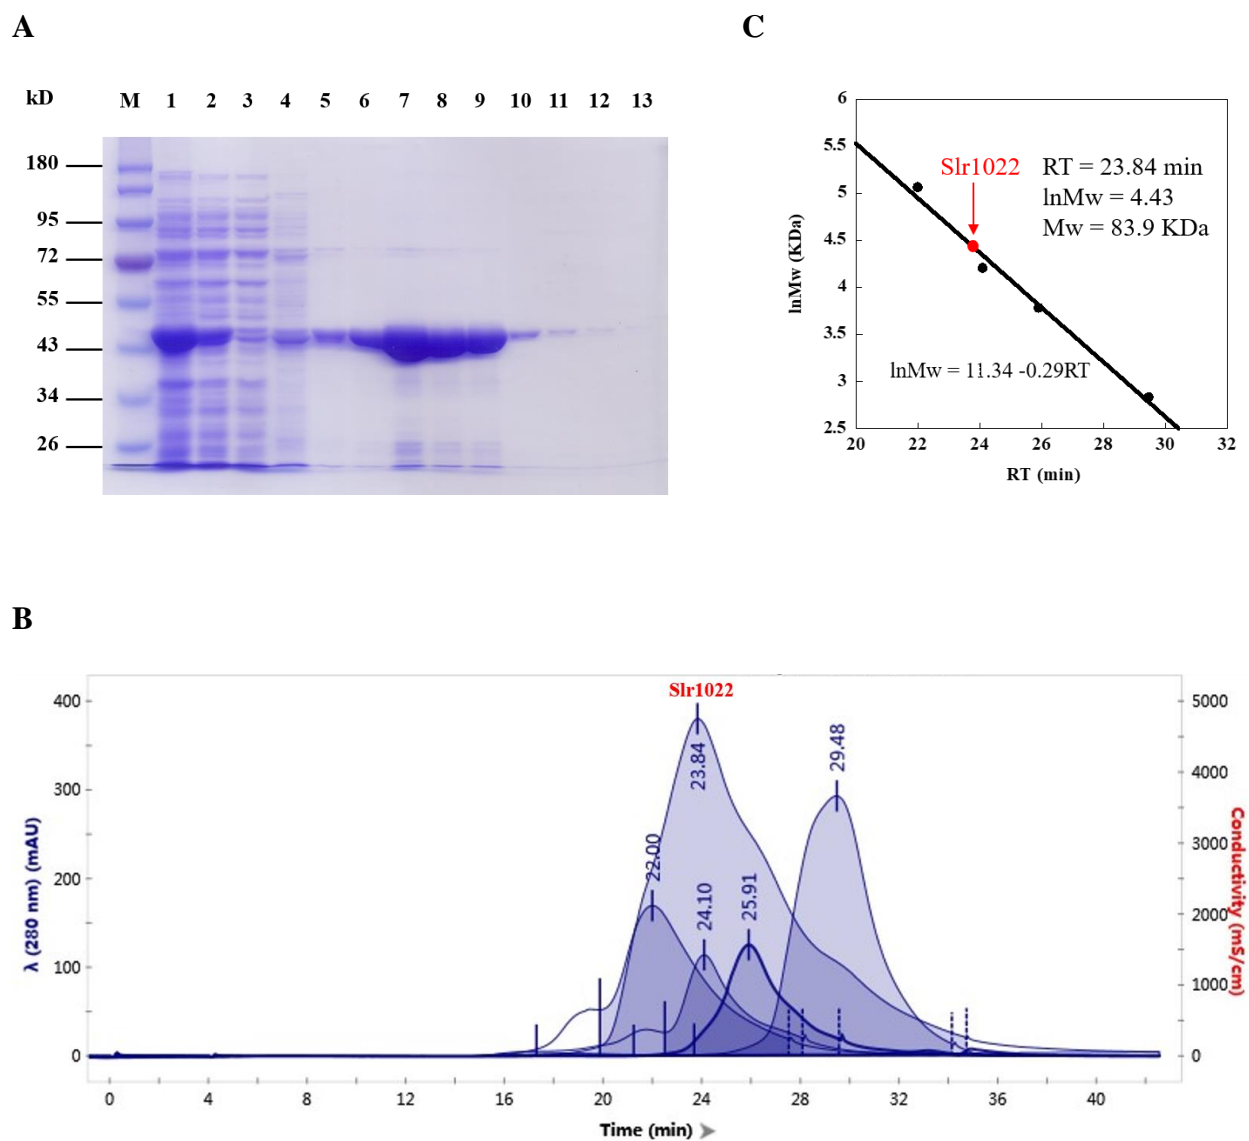

**Figure S1.** SDS-PAGE and fast protein liquid chromatography of Slr1022 protein. **A:** SDS-PAGE of purification of Y39F mutant. **B:** The elution peaks are bovine blood  $\gamma$ -globulin (158 kDa), Slr1022 protein, bovine albumin (67 kDa), albumin egg (44 kDa), myoglobin (17 kDa) from left to right in order and the value on the peak indicates the retention time (RT) of the protein in the high-resolution gel column. **C:** The standard curve was fitted by the formula  $\ln M_w = 11.34 - 0.29RT$ . Therefore, the size of Slr1022 protein was calculated to be about 83.9 kDa.

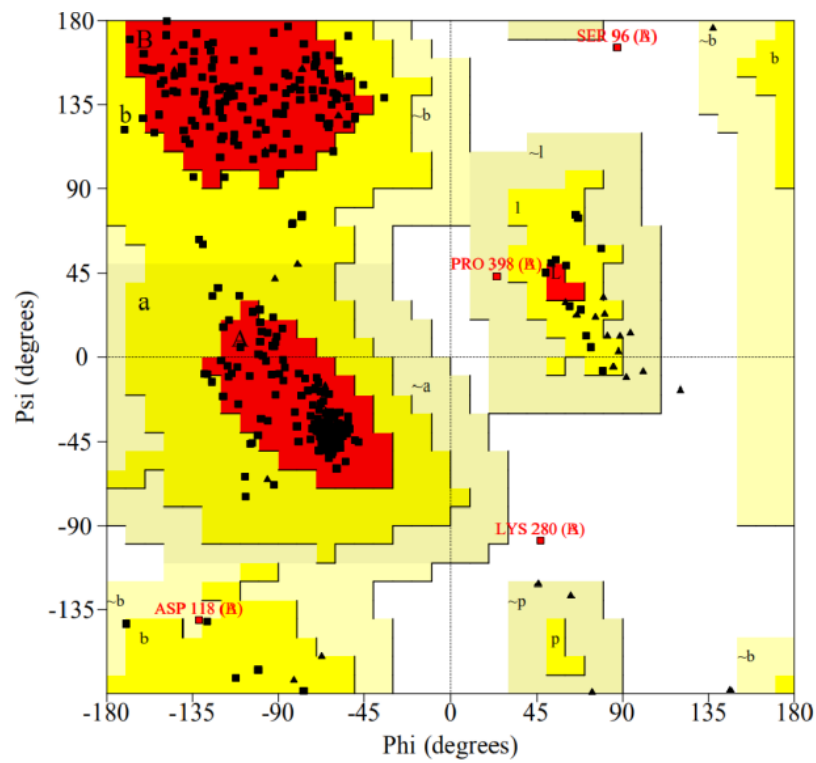

**Figure S2.** Ramachandran plot of Slr1022 model structure generated by PROCHECK program.

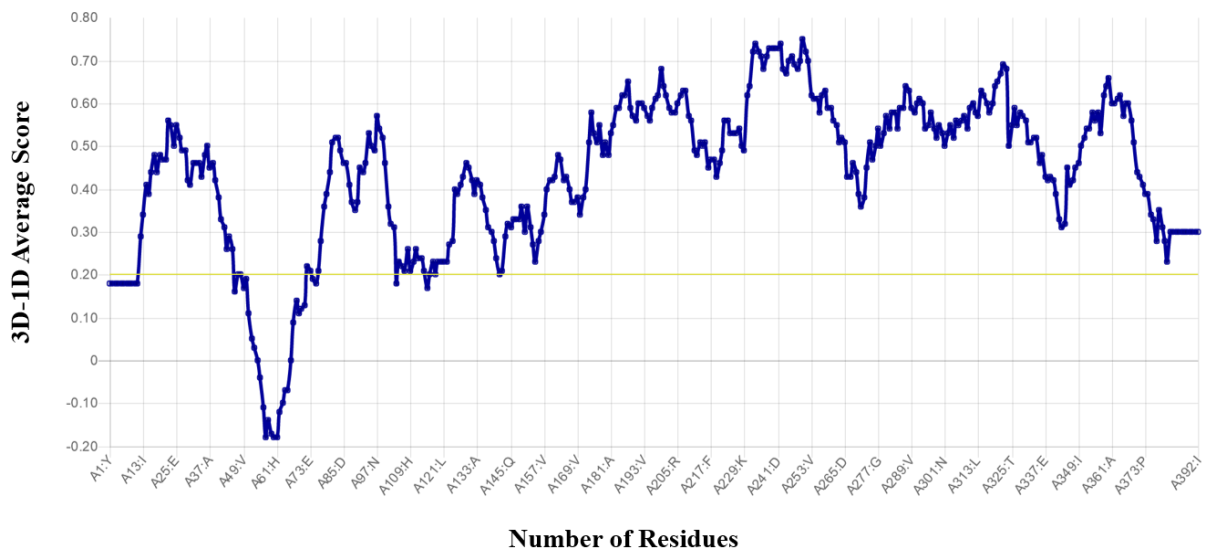

**Figure S3.** Verify 3D score chart of Slr1022. 89.92% of the amino acids have scored  $\geq 0.2$ .

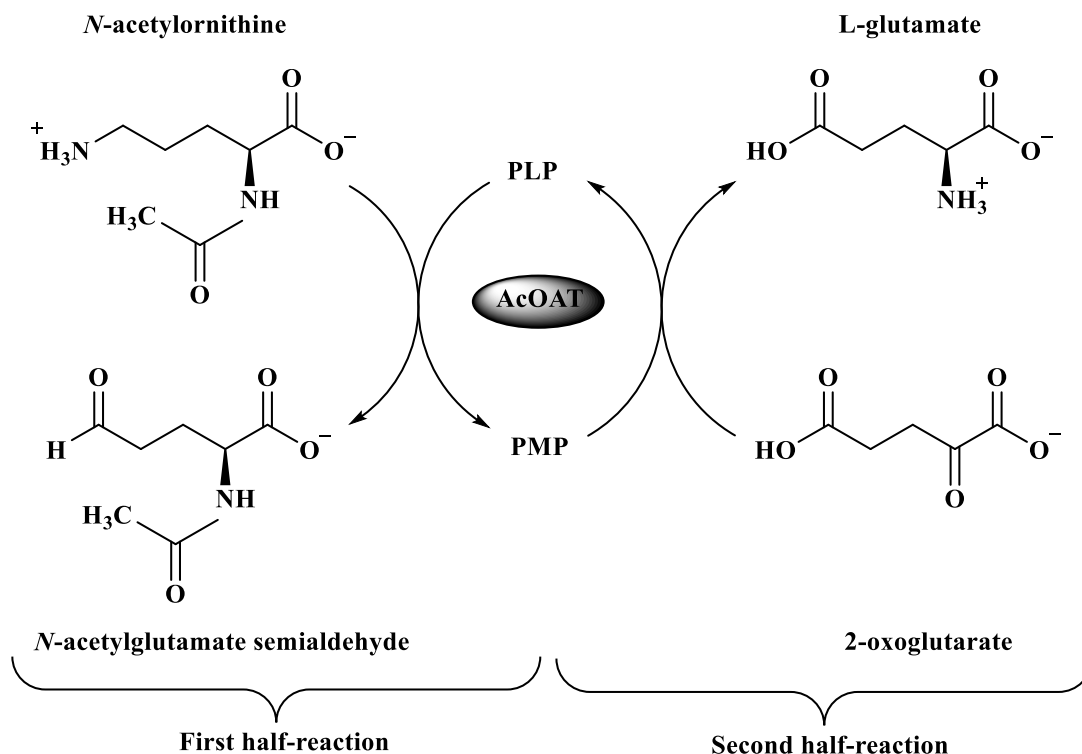

**Figure S4.** Both half reactions of Slr1022 as AcOAT. AcOAT, *N*-acetylornithine aminotransferase; PLP, pyridoxal 5'-phosphate; PMP, pyridoxamine 5'-phosphate. This scheme was adapted from reference [1,2].

[1] H. Lee, J.I. Juncosa, R.B. Silverman, Ornithine aminotransferase versus GABA aminotransferase: implications for the design of new anticancer drugs, *Medicinal Research Reviews* 35 (2015) 286-305. 10.1002/med.21328.

[2] V. Rajaram, P. Ratna Prasuna, H.S. Savithri, M.R. Murthy, Structure of biosynthetic *N*-acetylornithine aminotransferase from *Salmonella typhimurium*: studies on substrate specificity and inhibitor binding, *Proteins* 70 (2008) 429-441. 10.1002/prot.21567.
